# Supplementary material for: Physiological responses to affiliation during conversation: Comparing neurotypical males and males with Asperger syndrome
Source: PLoS One. 2019 Sep 18;14(9):e0222084. doi: 10.1371/journal.pone.0222084 (PMC6750568; doi:10.1371/journal.pone.0222084)
Supplement: S1 Syntax — (SPS) [file pone.0222084.s005.sps]

* Encoding: UTF-8.

*EDA FOR AS/NT DYADS

USE ALL.
COMPUTE filter_$=(Group = 1).
VARIABLE LABELS filter_$ 'Group = 1 (FILTER)'.
VALUE LABELS filter_$ 0 'Not Selected' 1 'Selected'.
FORMATS filter_$ (f1.0).
FILTER BY filter_$.
EXECUTE.

MIXED
Zscl_sig BY MM domi_dbin  WITH ZTime3 Zaffi_s Zaffi_o Zscl_sig_bsm 
/FIXED = MM MM*ZTime3 MM*domi_dbin*Zaffi_s MM*domi_dbin*Zaffi_o Zscl_sig_bsm   | NOINT
/PRINT = SOLUTION TESTCOV
/RANDOM MM MM*Ztime3 | SUBJECT(Id2) COVTYPE(UNR)
/REPEATED = MM | SUBJECT(Id2*Obs_id2) COVTYPE(CSH).

MIXED
Zscl_sig  BY MM  WITH ZTime3 Zaffi_s Zaffi_o  Zscl_sig_bsm 
/FIXED = MM MM*ZTime3 MM*Zaffi_s MM*Zaffi_o  Zscl_sig_bsm  | NOINT
/PRINT = SOLUTION TESTCOV
/RANDOM MM MM*ZTime3  | SUBJECT(Id2) COVTYPE(UNR)
/REPEATED = MM | SUBJECT(Id2*Obs_id2) COVTYPE(CSH).

*EDA FOR NT/NT DYADS

USE ALL.
COMPUTE filter_$=(Group = 2 ).
VARIABLE LABELS filter_$ 'Group = 2  (FILTER)'.
VALUE LABELS filter_$ 0 'Not Selected' 1 'Selected'.
FORMATS filter_$ (f1.0).
FILTER BY filter_$.
EXECUTE.

MIXED
Zscl_sig  BY domi_dbin WITH Ztime3 Zaffi_s Zaffi_o Zscl_sig_bsm
/FIXED = Ztime3 domi_dbin*Zaffi_s domi_dbin*Zaffi_o  Zscl_sig_bsm
/PRINT = SOLUTION TESTCOV
/RANDOM Intercept Ztime3  | SUBJECT(Id2) COVTYPE(UNR)
/REPEATED = MM | SUBJECT(Id2*Obs_id2) COVTYPE(CS).

MIXED
Zscl_sig  WITH Ztime3 Zaffi_s Zaffi_o  Zscl_sig_bsm
/FIXED = Ztime3 Zaffi_s Zaffi_o    Zscl_sig_bsm
/PRINT = SOLUTION TESTCOV
/RANDOM Intercept Ztime3  | SUBJECT(Id2) COVTYPE(UNR)
/REPEATED = MM | SUBJECT(Id2*Obs_id2) COVTYPE(CS).

*HR FOR AS/NT DYADS

USE ALL.
COMPUTE filter_$=(Group = 1 ).
VARIABLE LABELS filter_$ 'Group = 1 (FILTER)'.
VALUE LABELS filter_$ 0 'Not Selected' 1 'Selected'.
FORMATS filter_$ (f1.0).
FILTER BY filter_$.
EXECUTE.

MIXED
Zhr_sig  BY MM domi_dbin  WITH ZTime3 Zaffi_s Zaffi_o Zhr_sig_bsm
/FIXED = MM MM*Ztime3 MM*domi_dbin*Zaffi_s MM*domi_dbin*Zaffi_o Zhr_sig_bsm | NOINT
/PRINT = SOLUTION TESTCOV
/RANDOM MM MM*Ztime3 | SUBJECT(Id2) COVTYPE(UNR)
/REPEATED = MM | SUBJECT(Id2*Obs_id2) COVTYPE(CSH).

MIXED
Zhr_sig  BY MM  WITH ZTime3 Zaffi_s Zaffi_o Zhr_sig_bsm
/FIXED = MM MM*ZTime3 MM*Zaffi_s MM*Zaffi_o Zhr_sig_bsm | NOINT
/PRINT = SOLUTION TESTCOV
/RANDOM MM  MM*Ztime3 | SUBJECT(Id2) COVTYPE(UNR)
/REPEATED = MM | SUBJECT(Id2*Obs_id2) COVTYPE(CSH).

*HR FOR NT/NT DYADS

USE ALL.
COMPUTE filter_$=(Group = 2).
VARIABLE LABELS filter_$ 'Group = 2(FILTER)'.
VALUE LABELS filter_$ 0 'Not Selected' 1 'Selected'.
FORMATS filter_$ (f1.0).
FILTER BY filter_$.
EXECUTE.

MIXED
Zhr_sig  BY domi_dbin WITH ZTime3 Zaffi_s Zaffi_o Zhr_sig_bsm
/FIXED = ZTime3 domi_dbin*Zaffi_s domi_dbin*Zaffi_o  Zhr_sig_bsm
/PRINT = SOLUTION TESTCOV
/RANDOM Intercept ZTime3 | SUBJECT(Id2) COVTYPE(UNR)
/REPEATED = MM | SUBJECT(Id2*Obs_id2) COVTYPE(CS).

MIXED
Zhr_sig   WITH ZTime3 Zaffi_s Zaffi_o Zhr_sig_bsm
/FIXED = ZTime3 Zaffi_s Zaffi_o Zhr_sig_bsm
/PRINT = SOLUTION TESTCOV
/RANDOM Intercept ZTime3 | SUBJECT(Id2) COVTYPE(UNR)
/REPEATED = MM | SUBJECT(Id2*Obs_id2) COVTYPE(CS).

*HF FOR AS/NT DYADS

USE ALL.
COMPUTE filter_$=(Group = 1).
VARIABLE LABELS filter_$ 'Group = 1 (FILTER)'.
VALUE LABELS filter_$ 0 'Not Selected' 1 'Selected'.
FORMATS filter_$ (f1.0).
FILTER BY filter_$.
EXECUTE.

MIXED
Zhf_sig  BY MM domi_dbin  WITH ZTime3 Zaffi_s Zaffi_o Zhf_sig_bsm
/FIXED = MM MM*ZTime3 MM*domi_dbin*Zaffi_s MM*domi_dbin*Zaffi_o Zhf_sig_bsm | NOINT
/PRINT = SOLUTION TESTCOV
/RANDOM MM MM*ZTime3 | SUBJECT(Id2) COVTYPE(UNR)
/REPEATED = MM | SUBJECT(Id2*Obs_id2) COVTYPE(CSH).

MIXED
Zhf_sig BY MM  WITH ZTime3 Zaffi_s Zaffi_o Zhf_sig_bsm
/FIXED = MM MM*ZTime3 MM*Zaffi_s MM*Zaffi_o Zhf_sig_bsm | NOINT
/PRINT = SOLUTION TESTCOV
/RANDOM MM  MM*ZTime3 | SUBJECT(Id2) COVTYPE(UNR)
/REPEATED = MM | SUBJECT(Id2*Obs_id2) COVTYPE(CSH).

*HF FOR NT/NT DYADS

USE ALL.
COMPUTE filter_$=(Group = 2 ).
VARIABLE LABELS filter_$ 'Group = 2  (FILTER)'.
VALUE LABELS filter_$ 0 'Not Selected' 1 'Selected'.
FORMATS filter_$ (f1.0).
FILTER BY filter_$.
EXECUTE.

MIXED
Zhf_sig BY domi_dbin WITH ZTime3 Zaffi_s Zaffi_o Zhf_sig_bsm
/FIXED = ZTime3 domi_dbin*Zaffi_s domi_dbin*Zaffi_o  Zhf_sig_bsm
/PRINT = SOLUTION TESTCOV
/RANDOM Intercept ZTime3 | SUBJECT(Id2) COVTYPE(UNR)
/REPEATED = MM | SUBJECT(Id2*Obs_id2) COVTYPE(CS).

MIXED
Zhf_sig  WITH ZTime3 Zaffi_s Zaffi_o Zhf_sig_bsm 
/FIXED = ZTime3 Zaffi_s Zaffi_o  Zhf_sig_bsm 
/PRINT = SOLUTION TESTCOV
/RANDOM Intercept Ztime3 | SUBJECT(Id2) COVTYPE(UNR)
/REPEATED = MM | SUBJECT(Id2*Obs_id2) COVTYPE(CS).


* EMG-OO FOR AS/NT DYADS 

USE ALL.
COMPUTE filter_$=(Group = 1).
VALUE LABELS filter_$ 0 'Not Selected' 1 'Selected'.
FORMATS filter_$ (f1.0).
FILTER BY filter_$.
EXECUTE.

MIXED
Zoo_sig BY MM domi_dbin  WITH ZTime3 Zaffi_s Zaffi_o Zoo_sig_bsm 
/FIXED = MM MM*ZTime3 MM*domi_dbin*Zaffi_s MM*domi_dbin*Zaffi_o Zoo_sig_bsm   | NOINT
/PRINT = SOLUTION TESTCOV
/RANDOM MM MM*Ztime3 | SUBJECT(Id2) COVTYPE(UNR)
/REPEATED = MM | SUBJECT(Id2*Obs_id2) COVTYPE(CSH).


MIXED
Zoo_sig  BY MM  WITH ZTime3 Zaffi_s Zaffi_o  Zoo_sig_bsm 
/FIXED = MM MM*ZTime3 MM*Zaffi_s MM*Zaffi_o  Zoo_sig_bsm  | NOINT
/PRINT = SOLUTION TESTCOV
/RANDOM MM MM*ZTime3  | SUBJECT(Id2) COVTYPE(UNR)
/REPEATED = MM | SUBJECT(Id2*Obs_id2) COVTYPE(CSH).


* EMG-OO FOR NT/NT DYADS 

USE ALL.
COMPUTE filter_$=(Group = 2).
VALUE LABELS filter_$ 0 'Not Selected' 1 'Selected'.
FORMATS filter_$ (f1.0).
FILTER BY filter_$.
EXECUTE.

MIXED
Zoo_sig  BY domi_dbin WITH Ztime3 Zaffi_s Zaffi_o Zoo_sig_bsm
/FIXED = Ztime3 domi_dbin*Zaffi_s domi_dbin*Zaffi_o  Zoo_sig_bsm
/PRINT = SOLUTION TESTCOV
/RANDOM Intercept Ztime3  | SUBJECT(Id2) COVTYPE(UNR)
/REPEATED = MM | SUBJECT(Id2*Obs_id2) COVTYPE(CS).

MIXED
Zoo_sig  WITH Ztime3 Zaffi_s Zaffi_o  Zoo_sig_bsm
/FIXED = Ztime3 Zaffi_s Zaffi_o    Zoo_sig_bsm
/PRINT = SOLUTION TESTCOV
/RANDOM Intercept Ztime3  | SUBJECT(Id2) COVTYPE(UNR)
/REPEATED = MM | SUBJECT(Id2*Obs_id2) COVTYPE(CS).


* EMG-CS FOR AS/NT DYADS 


USE ALL.
COMPUTE filter_$=(Group = 1).
VALUE LABELS filter_$ 0 'Not Selected' 1 'Selected'.
FORMATS filter_$ (f1.0).
FILTER BY filter_$.
EXECUTE.

MIXED
Zcs_sig BY MM domi_dbin  WITH ZTime3 Zaffi_s Zaffi_o Zcs_sig_bsm 
/FIXED = MM MM*ZTime3 MM*domi_dbin*Zaffi_s MM*domi_dbin*Zaffi_o Zcs_sig_bsm   | NOINT
/PRINT = SOLUTION TESTCOV
/RANDOM MM MM*Ztime3 | SUBJECT(Id2) COVTYPE(UNR)
/REPEATED = MM | SUBJECT(Id2*Obs_id2) COVTYPE(CSH).


MIXED
Zcs_sig  BY MM  WITH ZTime3 Zaffi_s Zaffi_o  Zcs_sig_bsm 
/FIXED = MM MM*ZTime3 MM*Zaffi_s MM*Zaffi_o  Zcs_sig_bsm  | NOINT
/PRINT = SOLUTION TESTCOV
/RANDOM MM MM*ZTime3  | SUBJECT(Id2) COVTYPE(UNR)
/REPEATED = MM | SUBJECT(Id2*Obs_id2) COVTYPE(CSH).

* EMG-CS FOR NT/NT DYADS 

USE ALL.
COMPUTE filter_$=(Group = 2).
VALUE LABELS filter_$ 0 'Not Selected' 1 'Selected'.
FORMATS filter_$ (f1.0).
FILTER BY filter_$.
EXECUTE.

MIXED
Zcs_sig  BY domi_dbin WITH Ztime3 Zaffi_s Zaffi_o Zcs_sig_bsm
/FIXED = Ztime3 domi_dbin*Zaffi_s domi_dbin*Zaffi_o  Zcs_sig_bsm
/PRINT = SOLUTION TESTCOV
/RANDOM Intercept Ztime3  | SUBJECT(Id2) COVTYPE(UNR)
/REPEATED = MM | SUBJECT(Id2*Obs_id2) COVTYPE(CS).

MIXED
Zcs_sig  WITH Ztime3 Zaffi_s Zaffi_o  Zcs_sig_bsm
/FIXED = Ztime3 Zaffi_s Zaffi_o    Zcs_sig_bsm
/PRINT = SOLUTION TESTCOV
/RANDOM Intercept Ztime3  | SUBJECT(Id2) COVTYPE(UNR)
/REPEATED = MM | SUBJECT(Id2*Obs_id2) COVTYPE(CS).
